# Supplementary material for: Oxytocin modulates human chemosensory decoding of sex in a dose-dependent manner
Source: eLife. 2021 Jan 13;10:e59376. doi: 10.7554/eLife.59376 (PMC7806258; doi:10.7554/eLife.59376)
Supplement: Figure 4—source data 1. — Estratetraenol-induced visual gender judgment biases in the absence of drug treatment and after the nasal administrations of 12 IU oxytocin, 24 IU oxytocin, 12 IU vasopressin, and 24 IU vasopressin in high AQ and low AQ heterosexual male participants. [file elife-59376-fig4-data1.xlsx]

## Sheet: Exp 3-High AQ heterosexual men
SubjID	Age	AQ	Kinsey	NoDrug.CON.Z=-0.45	NoDrug.CON.Z=-0.3	NoDrug.CON.Z=-0.15	NoDrug.CON.Z=0	NoDrug.CON.Z=0.15	NoDrug.CON.Z=0.3	NoDrug.CON.Z=0.45	NoDrug.EST.Z=-0.45	NoDrug.EST.Z=-0.3	NoDrug.EST.Z=-0.15	NoDrug.EST.Z=0	NoDrug.EST.Z=0.15	NoDrug.EST.Z=0.3	NoDrug.EST.Z=0.45	12OT.CON.Z=-0.45	12OT.CON.Z=-0.3	12OT.CON.Z=-0.15	12OT.CON.Z=0	12OT.CON.Z=0.15	12OT.CON.Z=0.3	12OT.CON.Z=0.45	12OT.EST.Z=-0.45	12OT.EST.Z=-0.3	12OT.EST.Z=-0.15	12OT.EST.Z=0	12OT.EST.Z=0.15	12OT.EST.Z=0.3	12OT.EST.Z=0.45	24OT.CON.Z=-0.45	24OT.CON.Z=-0.3	24OT.CON.Z=-0.15	24OT.CON.Z=0	24OT.CON.Z=0.15	24OT.CON.Z=0.3	24OT.CON.Z=0.45	24OT.EST.Z=-0.45	24OT.EST.Z=-0.3	24OT.EST.Z=-0.15	24OT.EST.Z=0	24OT.EST.Z=0.15	24OT.EST.Z=0.3	24OT.EST.Z=0.45	12VP.CON.Z=-0.45	12VP.CON.Z=-0.3	12VP.CON.Z=-0.15	12VP.CON.Z=0
1	21	36	0	0.01107	0.09957	0.21464	0.67557	0.991	0.98171	1	0.02536	0.09671	0.19464	0.727	0.96243	1	0.98571	0.0975	0.216	0.54917	1	1	0.97933	1	0.07964	0.111	0.2575	0.81557	0.96243	1	1	0	0.08243	0.32607	0.87557	0.98243	0.996	1	0	0.07957	0.25179	0.78414	0.94814	0.996	1	0.05107	0.04457	0.79321	0.75557
2	24	29	0	0.002	0.00162	0.07469	0.55888	0.9615	1	0.98121	0.002	0.00733	0	0.46174	0.85864	0.95543	0.9955	0.002	0.00733	0.0004	0.31031	0.94436	1	1	0.002	0	0.0185	0.3165	0.75817	0.95733	0.9955	0.002	0.00733	0.0404	0.4246	0.94436	0.96971	0.9955	0.002	0.00733	0.09826	0.47388	0.92364	0.91257	1	0	0.00733	0.06326	0.31317
3	24	25	0	0	0.02729	0.15857	0.42043	0.73621	0.94514	0.979	0.02507	0.02729	0.06429	0.32329	0.46479	0.83371	0.98471	0	0	0.07	0.149	0.6705	0.848	0.959	0	0.00967	0	0.21567	0.57717	0.93467	0.96233	0	0.05443	0.16	0.42186	0.71407	0.91229	0.96471	0.03079	0.01586	0.07571	0.39757	0.77907	0.90229	0.99043	0.0165	0.013	0.17	0.249
4	24	32	0	0.13314	0.28971	0.65586	0.96657	1	0.991	0.9975	0.01886	0.28971	0.58157	0.75229	0.88607	0.991	0.9975	0.056	0.359	0.683	1	1	1	0.9975	0.04933	0.164	0.41633	0.86467	0.9475	0.991	0.9975	0.036	0.104	0.38157	0.64657	0.9175	1	0.9975	0.036	0.09829	0.60157	0.80943	0.92321	0.991	0.9975	0.061	0.179	0.68467	1
5	23	29	0	0	0.02629	0.12707	0.65021	0.92371	1	0.986	0	0.02057	0.1385	0.43879	0.77514	0.94971	0.986	0	0.012	0.19017	0.41283	0.72467	0.894	0.936	0	0.012	0.06517	0.42117	0.848	0.934	0.98933	0	0.00629	0.04136	0.34736	0.78657	0.93257	1	0	0.00629	0.04707	0.38736	0.78086	0.96971	0.95743	0	0	0.02993	0.65593
6	23	26	0	0.00367	0.02274	0.17626	0.47252	0.79721	0.99576	0.998	0.00367	0.03083	0.19817	0.57633	0.78817	1	0.98133	0	0.03417	0.08483	0.5211	0.84864	0.97005	1	0.00367	0	0.22412	0.41538	0.88936	0.98433	0.998	0	0.01036	0.18007	0.77014	0.99293	1	0.998	0.00367	0.0656	0.31912	0.56681	0.92864	0.99005	0.998	0.00367	0	0.15055	0.44395
7	26	25	0	0	0	0.02917	0.21281	0.80731	0.998	0.99833	0	0	0.11202	0.51852	0.96731	0.998	0.99833	0	0	0	0.45281	0.90731	0.97514	0.98405	0	0.04286	0.05131	0.46567	0.94088	0.96943	0.99833	0	0.01429	0.06917	0.4671	0.92731	0.998	0.99833	0	0	0.09774	0.53852	0.89874	0.998	0.99833	0	0	0.08583	0.33233
8	27	27	0	0	0	0.47286	0.80748	0.95069	1	0.98833	0.0025	0.09007	0.37643	0.71819	0.89712	0.93536	0.98833	0.03107	0.05436	0.33714	0.72533	0.9864	0.97821	1	0.01679	0.05674	0.13476	0.71462	0.8126	0.96274	1	0.0025	0.04007	0.09071	0.61462	0.87212	0.9925	0.98833	0.0025	0.08436	0.29286	0.81748	1	1	0.98833	0.0025	0.13579	0.35286	0.78033
9	22	27	0	0.004	0.02829	0.19981	0.422	0.84133	0.94295	0.95981	0.02686	0.05971	0.07124	0.43914	0.7899	0.9801	1	0.004	0.014	0.11124	0.24581	0.62133	0.91914	0.93981	0.004	0.02829	0.05695	0.22771	0.57562	0.81152	0.92552	0.004	0.014	0.05124	0.27629	0.69276	0.9401	1	0	0.014	0.08552	0.29629	0.65276	0.88295	0.98838	0.01829	0.07114	0.18267	0.43057
10	28	28	1	0.004	0	0.20914	0.53771	0.93029	0.99976	0.99238	0	0.01457	0	0.54057	0.916	0.95976	0.99238	0.004	0.04029	0.26057	0.60057	0.78743	0.95976	1	0.02067	0.01933	0.08533	0.512	0.896	0.98833	0.97	0.01257	0.04886	0	0.60629	0.78457	0.95119	1	0.004	0.08314	0.20057	0.37486	0.94457	0.96214	1	0.004	0.02029	0.27771	0.73486
11	24	27	0	0.00167	0.02886	0.13762	0.40648	0.83338	1	0.99633	0.01595	0.04029	0.10333	0.5379	0.81624	0.96514	0.99633	0.00167	0.02886	0.1119	0.47219	0.8791	0.97371	0.99633	0.02786	0.00457	0	0.416	0.82338	0.97371	0.99633	0.01595	0.02029	0.22905	0.50362	0.78767	0.97371	0.99633	0.00167	0.0885	0.1625	0.76183	0.871	0.9755	1	0.00167	0.026	0.19476	0.66076
12	25	27	0	0.01829	0.02029	0.03836	0.43007	0.79886	0.94743	0.97971	0.004	0	0.09217	0.4715	0.91267	0.97933	0.97733	0.004	0.02029	0.28979	0.45864	0.97029	0.96171	1	0.004	0.02029	0.18979	0.53793	0.91314	1	0.994	0.004	0.02029	0.09836	0.64436	0.99029	0.996	0.98543	0	0	0.07264	0.39864	0.82457	0.96171	1	0	0	0.08121	0.50436
13	27	26	0	0	0.002	0.0421	0.52143	0.87536	0.9955	1	0.0025	0.01629	0.12781	0.555	0.91679	0.9955	1	0.0025	0.002	0.03852	0.53214	0.84321	0.97764	1	0.0025	0.002	0.07424	0.36429	0.9325	0.98121	1	0.0025	0.002	0.01924	0.47786	0.99393	1	1	0.0025	0.01629	0.07543	0.41786	0.85393	0.9955	1	0.0025	0	0.08781	0.61786
14	24	34	0	0.01	0.05886	0.17629	0.35857	0.76114	0.97714	1	0.01	0.016	0.062	0.47857	0.81543	0.96	0.97171	0	0.01029	0.13629	0.30714	0.84971	0.94	0.97743	0.04714	0.01886	0	0.19857	0.73829	0.86286	1	0.01	0.016	0.002	0.44429	0.87257	1	0.986	0	0.016	0.102	0.40714	0.81829	0.92857	1	0	0.00457	0.202	0.61857
15	24	26	0	0.01917	0.013	0.05757	0.38645	0.89762	0.96926	0.98371	0.0025	0.013	0.03329	0.43979	0.78857	0.96736	0.98371	0	0	0	0.3755	0.64333	0.96617	0.96467	0.0525	0.00633	0.09567	0.2755	0.72333	0.98117	0.968	0.01345	0.02157	0.04329	0.36074	0.82333	0.95783	0.98371	0	0.02729	0.17186	0.41788	0.72905	0.96926	0.95514	0.01345	0.02729	0.09757	0.25217
16	27	29	0	0.004	0.04229	0.07257	0.49829	0.85514	0.97171	0.992	0	0.04229	0.12686	0.42686	0.86371	0.986	0.992	0.004	0.008	0.124	0.39829	0.68371	0.97743	0.99771	0.004	0.02229	0.104	0.18114	0.76657	0.99171	1	0.02067	0.04133	0.14733	0.354	0.92133	1	0.95867	0	0	0.02971	0.34686	0.87514	0.886	0.992	0.004	0.008	0.18686	0.38114
17	22	34	0	0.0115	0.03836	0.2345	0.51521	0.95593	0.96071	0.987	0.0115	0.02979	0.21736	0.54379	0.8845	0.96071	0.987	0	0.07979	0.20021	0.60736	1	0.99643	0.99771	0.0315	0.0355	0.1545	0.5095	1	0.995	1	0.0115	0.02979	0.16021	0.74379	0.96164	0.98643	0.987	0.0115	0.02407	0.1345	0.64664	0.93879	1	0.987	0.004	0.0005	0.132	0.347
18	24	27	0	0.03357	0.07357	0.10421	0.56279	0.893	0.981	0.998	0.005	0.05929	0.18136	0.63993	0.89586	1	0.998	0	0.05214	0	0.5085	0.95086	0.95243	0.98371	0.025	0	0.2235	0.7085	1	0.991	0.998	0.005	0.09643	0.21564	0.6685	0.913	1	0.98371	0.03357	0.01286	0.26207	0.66921	0.93657	0.93814	0.998	0.01929	0.01357	0.18421	0.61707
19	24	30	0	0.002	0.0105	0.0605	0.3015	0.71514	1	0.998	0.002	0.0105	0.05479	0.37579	0.62657	0.97471	0.998	0.002	0.01883	0.05217	0.3315	0.70467	0.93567	0.998	0.01629	0	0.06907	0.30721	0.818	0.969	0.998	0.002	0	0	0.28721	0.73514	0.94043	0.998	0	0.0105	0.02907	0.37293	0.79514	0.93186	0.96943	0.002	0	0.09193	0.2615
20	25	29	0	0.01429	0.002	0.04486	0.18093	0.76264	0.95343	0.996	0	0.002	0.03343	0.17807	0.67693	0.96486	0.996	0	0.002	0.002	0.22093	0.69407	0.96771	0.996	0	0.002	0.05533	0.32617	0.70883	0.96867	0.996	0	0.002	0.03629	0.2145	0.77907	0.96771	0.996	0	0.002	0.01629	0.38664	0.76264	0.98771	0.996	0	0	0.13629	0.51521
21	26	29	0	0	0.006	0.08979	0.74657	1	0.95114	1	0	0	0.17764	0.60657	0.95286	1	1	0	0.006	0.01383	0.54133	0.89667	0.97733	0.98333	0	0.006	0.11717	0.398	0.85333	1	1	0	0.03457	0.1405	0.86657	0.90714	0.994	1	0	0.006	0.15193	0.67229	0.92143	0.994	1	0	0.006	0.07193	0.36657
22	23	28	0	0	0.08779	0.14107	0.608	0.84593	0.96136	1	0.03886	0	0.10036	0.62657	0.97021	0.8585	0.98971	0.06767	0.00683	0.1025	0.38467	0.77117	1	0.94567	0.016	0.0085	0.1025	0.318	0.7395	0.9735	0.964	0.04386	0.04779	0.0725	0.51371	0.8545	0.98993	0.93614	0.07243	0	0.20964	0.608	0.85736	0.9985	0.96471	0.02386	0.04493	0.20964	0.66229
23	22	30	0	0.01795	0	0.14324	0.49971	0.93105	0.97771	1	0.00367	0.00333	0.20895	0.50257	1	1	0.98571	0.00367	0.06619	0.10038	0.61971	0.99676	1	1	0.00367	0.03762	0.09467	0.58829	0.89676	0.992	1	0.00367	0.01762	0.1661	0.64257	0.89676	0.992	1	0	0	0.09752	0.45114	0.91676	0.992	1	0.03224	0	0.00038	0.46257
24	22	29	0	0.03457	0	0.1855	0.286	0.76736	0.99571	0.96693	0.006	0.03929	0.18836	0.29171	0.73593	0.98143	0.9955	0.02267	0.025	0.2705	0.58433	0.9695	1	1	0.04886	0.00357	0.00979	0.61529	0.92307	0.97	0.98121	0.006	0.04167	0.15217	0.39267	0.92117	0.95333	0.97883	0.00029	0.00786	0.08264	0.39457	0.91021	0.97	0.98121	0	0.05643	0.31121	0.546
	AQ	score on the Autism Spectrum Quotient
	NoDrug	no drug treatment
	12OT	12 IU oxytocin
	24OT	24 IU oxytocin
	12VP	12 IU vasopressin
	24VP	24 IU vasopressin
	CON	carrier control
	EST	estratetraenol
	Z	Z score that quantifies the gender of point-light walkers (PLWs)
	Z=0.prop.bias	proportional ‘male’ biases at the gender-neutral point of the PLWs (Z = 0)
	PSE	point of subjective equality
	DL	difference limen
[truncated: 54 more columns]

## Sheet: Exp 5-Low AQ heterosexual men
SubjID	Age	AQ	Kinsey	NoDrug.CON.Z=-0.45	NoDrug.CON.Z=-0.3	NoDrug.CON.Z=-0.15	NoDrug.CON.Z=0	NoDrug.CON.Z=0.15	NoDrug.CON.Z=0.3	NoDrug.CON.Z=0.45	NoDrug.EST.Z=-0.45	NoDrug.EST.Z=-0.3	NoDrug.EST.Z=-0.15	NoDrug.EST.Z=0	NoDrug.EST.Z=0.15	NoDrug.EST.Z=0.3	NoDrug.EST.Z=0.45	12OT.CON.Z=-0.45	12OT.CON.Z=-0.3	12OT.CON.Z=-0.15	12OT.CON.Z=0	12OT.CON.Z=0.15	12OT.CON.Z=0.3	12OT.CON.Z=0.45	12OT.EST.Z=-0.45	12OT.EST.Z=-0.3	12OT.EST.Z=-0.15	12OT.EST.Z=0	12OT.EST.Z=0.15	12OT.EST.Z=0.3	12OT.EST.Z=0.45	24OT.CON.Z=-0.45	24OT.CON.Z=-0.3	24OT.CON.Z=-0.15	24OT.CON.Z=0	24OT.CON.Z=0.15	24OT.CON.Z=0.3	24OT.CON.Z=0.45	24OT.EST.Z=-0.45	24OT.EST.Z=-0.3	24OT.EST.Z=-0.15	24OT.EST.Z=0	24OT.EST.Z=0.15	24OT.EST.Z=0.3	24OT.EST.Z=0.45	12VP.CON.Z=-0.45	12VP.CON.Z=-0.3	12VP.CON.Z=-0.15	12VP.CON.Z=0
1	23	8	0	0.03733	0.06117	0.11317	0.40233	0.80517	0.932	0.97817	0.004	0	0.01436	0.18686	0.7885	0.92486	0.9865	0.004	0	0.03317	0.304	0.7285	0.922	1	0.02067	0.0195	0.08817	0.21067	0.68017	0.97367	0.9865	0	0.0945	0.25317	0.57067	0.70183	0.95867	0.96983	0.004	0.0695	0.10483	0.669	0.72183	1	0.92817	0.004	0.0195	0.11793	0.494
2	25	18	0	0	0	0	0.2875	0.79667	0.96583	0.994	0	0.04057	0	0.14321	0.74	0.98821	0.994	0	0.012	0.068	0.41607	0.74571	0.98964	0.994	0	0.012	0.068	0.19821	0.60286	0.86464	0.994	0	0.02867	0.068	0.35083	0.80667	0.95583	0.99733	0	0.012	0.048	0.18893	0.63143	0.95964	0.994	0	0.012	0.07657	0.3375
3	23	14	0	0.00179	0.07286	0	0.3415	0.75357	0.974	0.981	0	0	0.06321	0.19507	0.71786	0.934	0.98671	0.0125	0.04667	0.06583	0.38317	0.925	0.95733	1	0.0125	0.02667	0.0675	0.34317	0.89833	0.95733	0.981	0.0125	0.04429	0.0575	0.27364	0.71429	1	0.96671	0.0125	0.03	0.07417	0.4765	0.80833	0.994	1	0.02917	0.03	0.0575	0.3665
4	23	12	0	0.002	0.01067	0.09226	0.56274	0.87788	0.94664	0.99267	0.002	0.024	0.11083	0.48083	0.91883	1	0.976	0.01629	0	0	0.47036	0.86264	0.9895	1	0	0.01067	0.0294	0.3256	0.78074	0.9895	0.99267	0.01629	0.01067	0.1594	0.33345	0.9436	0.9895	0.99267	0.002	0.06067	0.08917	0.46083	0.89717	1	0.99267	0.002	0	0.16083	0.63417
5	23	16	1	0.002	0.06154	0.26436	0.89	0.95971	0.98371	1	0.01629	0.03582	0.28293	0.77786	0.974	0.98371	1	0	0.05725	0.39483	0.925	0.97733	1	0.98333	0.01629	0	0.2115	0.76357	0.99971	0.98371	1	0.002	0.05011	0.23436	0.76357	0.994	0.998	1	0.002	0.02439	0.24007	0.755	0.97971	0.998	1	0.002	0.05582	0.2915	0.71214
6	35	24	0	0	0.002	0.00517	0.30117	0.71633	0.91283	0.97083	0	0.002	0.12517	0.38117	0.81633	0.96283	1	0	0.01867	0.11517	0.55783	0.82967	0.9345	0.9875	0	0.002	0.2535	0.5695	1	1	1	0	0.002	0.09564	0.40307	0.69729	1	0.9875	0	0.03057	0.13564	0.48593	0.81157	0.97093	1	0	0	0.03279	0.37736
7	26	22	0	0	0.0125	0.06786	0.51814	0.80414	0.94114	1	0	0.0125	0.15071	0.621	1	1	0.9875	0.01429	0.00179	0.09286	0.53457	0.72771	1	0.98393	0	0	0.185	0.481	0.967	0.944	0.9875	0	0.0375	0.075	0.581	0.8545	0.9765	0.9875	0.01429	0.02679	0.13571	0.49171	0.83486	0.94971	0.9875	0	0.0125	0.225	0.531
8	27	18	0	0.029	0.013	0.084	0.49383	0.9105	1	0.971	0.01257	0	0.12043	0.3999	0.93371	1	1	0.004	0.008	0.02043	0.52848	0.75657	0.9761	1	0	0.00467	0.079	0.34467	0.848	0.95133	0.97933	0.004	0.00467	0.03567	0.39467	0.78133	0.968	0.996	0.01829	0.008	0.10329	0.28562	0.89657	0.97038	0.98171	0.004	0.108	0.149	0.62562
9	28	17	0	0.002	0.0519	0.18286	0.70038	0.92871	0.9935	1	0.002	0	0.18643	0.56824	0.97514	0.97921	0.9975	0.002	0.02333	0.21429	0.59681	0.90657	0.9935	0.9975	0.002	0	0.08	0.55395	0.91514	0.9935	0.9975	0.01629	0.0519	0.21143	0.6311	0.93229	0.99921	0.9975	0.002	0.03762	0.16857	0.5511	0.88086	1	0.9975	0.03533	0.13167	0.39833	0.86467
10	26	19	0	0.01429	0.03686	0.10807	0.45493	0.89479	0.982	0.97571	0	0.014	0.1395	0.51683	0.84383	0.982	0.99	0	0.05686	0.24236	0.7635	0.89764	0.99343	0.99	0.01429	0	0.19664	0.6235	0.87193	0.96771	0.99	0	0.02829	0.07521	0.44136	0.7805	0.92486	0.96143	0.03333	0.03067	0.18117	0.5235	0.9555	0.94033	1	0	0.00733	0.17617	0.47017
11	24	19	0	0	0.02	0.05883	0.471	0.8725	1	1	0	0	0.09383	0.411	0.79083	0.99017	0.9975	0	0	0.0524	0.18957	0.8075	0.97588	0.9975	0	0	0.0605	0.321	0.7875	1	0.9975	0	0	0.03812	0	0.67607	0.9816	0.9975	0	0	0.02383	0.141	0.6275	0.97588	0.9975	0	0.01429	0.04383	0.10671
12	24	24	1	0	0.005	0.091	0.3125	1	1	0.996	0	0.01929	0.07243	0.32679	0.78729	0.96771	0.996	0.01879	0.01929	0.01529	0.3525	0.85871	0.96771	1	0.0045	0.005	0.02386	0.17821	0.83586	0.97343	1	0.0045	0.005	0.04671	0.39821	0.99586	0.982	0.996	0.0045	0.005	0.13529	0.61536	0.93014	0.97343	0.996	0.0045	0.02167	0.05767	0.19583
13	23	14	0	0	0.14357	0.21314	0.67614	0.87543	0.9965	0.96643	0	0.08357	0.11243	0.47257	0.969	0.93364	0.96643	0.03586	0.205	0.42671	0.60829	0.88686	0.94793	1	0.018	0.105	0.216	0.819	0.844	0.9765	1	0.02633	0.055	0.38267	0.619	0.90233	0.93483	0.97833	0.018	0.09667	0.341	0.794	0.81067	0.93483	0.995	0.05133	0.12167	0.24933	0.444
14	21	11	0	0.01962	0.04752	0.18376	0.65555	0.89583	0.99333	0.98883	0	0.01824	0.06948	0.65412	0.93583	0.97905	1	0.00533	0.04633	0.20567	0.58317	0.8025	0.99333	0.98883	0.00533	0.00395	0.17233	0.6084	0.87012	0.99333	0.98883	0.00533	0.02967	0.12948	0.70269	0.94726	0.97905	0.98883	0.00533	0.02967	0.14948	0.53698	0.96155	0.97905	0.98883	0.0339	0	0.19805	0.74364
15	21	21	0	0	0	0.23607	0.8195	1	0.98171	1	0.002	0	0.15893	0.43664	0.95836	0.98171	1	0.002	0.006	0.2275	0.60521	1	0.98171	1	0.002	0.02029	0.19893	0.67664	0.89836	0.996	1	0.002	0.03457	0.32393	0.59307	0.9205	0.996	1	0.002	0.006	0	0.5395	0.8955	0.996	1	0.002	0.026	0.0875	0.5595
16	23	22	0	0.007	0.15083	0.49967	0.78667	0.94183	1	1	0.00129	0.11036	0.37443	0.54429	0.9485	0.96821	0.993	0.02129	0.03036	0.19157	0.66143	0.93136	0.96821	0.993	0.02367	0.02417	0.38967	0.82	0.9285	0.9825	0.993	0.03557	0.07464	0.458	0.76643	0.89421	0.99321	0.97871	0.03557	0.03036	0.19443	0.76429	0.93136	0.9825	0.993	0.007	0.08536	0.39729	0.69857
17	22	19	0	0.015	0.00229	0.03814	0.24886	0.73202	0.98981	0.96919	0.015	0.02967	0.08267	0.101	0.41417	0.83267	0.92633	0	0.01657	0	0.32029	0.79631	0.95767	0.99776	0	0.00967	0.136	0.311	0.7575	0.91933	0.97633	0.02333	0.013	0.08933	0.26433	0.73917	0.92433	0.92633	0.015	0.02157	0.10743	0.23671	0.75702	0.98695	0.97348	0	0.05967	0.07267	0.30433
18	23	14	0	0.008	0.018	0.03233	0.24231	0.78567	0.96633	0.9835	0.008	0.018	0.099	0.2185	0.699	0.943	0.9235	0.008	0.018	0.10805	0.32017	0.83281	0.98062	0.97993	0.008	0	0.07519	0.43945	0.77995	0.98633	0.9235	0.008	0	0	0.33088	0.83424	0.99205	1	0.02229	0.018	0.02376	0.25945	0.85424	0.98633	0.9835	0.00229	0.07514	0.22376	0.36802
19	24	18	0	0.01429	0	0.02621	0.30848	0.9826	0.9661	0.98371	0	0.00457	0	0.47514	0.9445	1	0.998	0	0.00933	0.02907	0.38848	0.8026	0.99467	0.98371	0	0	0.05764	0.27419	0.9826	0.99467	0.998	0	0.00933	0.0205	0.5799	0.93402	0.99467	0.998	0	0.00933	0.08907	0.39705	0.97402	0.99467	0.998	0	0.02362	0.10336	0.45133
20	22	19	0	0.002	0	0	0.43867	0.64183	0.95417	0.97883	0.002	0.011	0.08317	0.35533	0.73767	0.91667	1	0.01629	0.03779	0.10174	0.22962	0.82588	0.85417	0.97288	0	0.0035	0.07888	0.35819	0.66874	1	0.93002	0.002	0	0.13317	0.23033	0.67517	0.8875	1	0.002	0.0235	0.05602	0.39248	0.62874	0.93702	0.9586	0.002	0.0235	0.10317	0.28533
21	20	18	0	0.05307	0.01679	0.22671	0.49629	0.82829	0.986	0.97821	0	0.04917	0.101	0.53867	0.864	1	0.97583	0.04117	0.04917	0.20767	0.57867	0.89067	0.99267	0.95917	0.05664	0.02821	0.261	0.65343	0.86471	1	0.97821	0.0245	0.07583	0.20267	0.51533	0.77067	0.93267	0.95917	0.04117	0.0425	0.07433	0.36867	0.91733	0.98933	0.9425	0.0345	0.0775	0.081	0.677
22	22	19	0	0.01267	0.03095	0.02967	0.2361	0.59867	0.89188	0.95514	0	0	0	0.16086	0.452	0.9195	0.98371	0.00695	0.04524	0.1811	0.54752	0.92152	0.97188	0.998	0.02695	0.04524	0.2361	0.59538	0.94367	0.98617	0.998	0.01267	0	0.04967	0.48133	0.922	0.99617	1	0.01267	0.04524	0.19324	0.57395	0.97938	0.99688	0.998	0.02695	0.05381	0.15824	0.5961
23	24	14	0	0.00807	0	0.08786	0.35836	0.89693	0.95021	0.96093	0	0.0285	0.035	0.3705	0.8605	0.9745	0.9895	0.0195	0.0435	0.09167	0.73883	0.94217	0.93783	0.9295	0	0.0535	0.065	0.3755	0.9255	0.7495	0.9745	0.06593	0.04279	0.34286	0.32264	0.7955	0.97164	0.9895	0	0.05636	0	0.38979	0.83407	0.92736	0.98093	0	0.09636	0.17071	0.37264
24	24	8	0	0	0.03429	0.16086	0.64371	0.96443	0.93121	1	0	0.04	0.078	0.478	0.823	0.8905	0.9285	0.0165	0.01667	0.14133	0.428	0.723	0.90383	0.97183	0.0165	0.04857	0.058	0.35229	0.70871	0.92764	0.95993	0.0165	0	0.06133	0.63133	0.863	1	0.9885	0.03079	0	0.08371	0.32371	0.85157	0.94193	0.99421	0.00507	0.00857	0.12943	0.59514
	AQ	score on the Autism Spectrum Quotient
	NoDrug	no drug treatment
	12OT	12 IU oxytocin
	24OT	24 IU oxytocin
	12VP	12 IU vasopressin
	24VP	24 IU vasopressin
	CON	carrier control
	EST	estratetraenol
	Z	Z score that quantifies the gender of point-light walkers (PLWs)
	Z=0.prop.bias	proportional ‘male’ biases at the gender-neutral point of the PLWs (Z = 0)
	PSE	point of subjective equality
	DL	difference limen
[truncated: 54 more columns]
