# Supplementary material for: Oxytocin modulates human chemosensory decoding of sex in a dose-dependent manner
Source: eLife. 2021 Jan 13;10:e59376. doi: 10.7554/eLife.59376 (PMC7806258; doi:10.7554/eLife.59376)
Supplement: Figure 4—source data 2. — Estratetraenol-induced visual gender judgment biases after the nasal administrations of saline, 12 IU oxytocin, and 24 IU oxytocin in high AQ heterosexual male participants. [file elife-59376-fig4-data2.xlsx]

## Sheet: Exp 4-High AQ heterosexual men
SubjID	Age	AQ	Kinsey	SAL.CON.Z=-0.45	SAL.CON.Z=-0.3	SAL.CON.Z=-0.15	SAL.CON.Z=0	SAL.CON.Z=0.15	SAL.CON.Z=0.3	SAL.CON.Z=0.45	SAL.EST.Z=-0.45	SAL.EST.Z=-0.3	SAL.EST.Z=-0.15	SAL.EST.Z=0	SAL.EST.Z=0.15	SAL.EST.Z=0.3	SAL.EST.Z=0.45	12OT.CON.Z=-0.45	12OT.CON.Z=-0.3	12OT.CON.Z=-0.15	12OT.CON.Z=0	12OT.CON.Z=0.15	12OT.CON.Z=0.3	12OT.CON.Z=0.45	12OT.EST.Z=-0.45	12OT.EST.Z=-0.3	12OT.EST.Z=-0.15	12OT.EST.Z=0	12OT.EST.Z=0.15	12OT.EST.Z=0.3	12OT.EST.Z=0.45	24OT.CON.Z=-0.45	24OT.CON.Z=-0.3	24OT.CON.Z=-0.15	24OT.CON.Z=0	24OT.CON.Z=0.15	24OT.CON.Z=0.3	24OT.CON.Z=0.45	24OT.EST.Z=-0.45	24OT.EST.Z=-0.3	24OT.EST.Z=-0.15	24OT.EST.Z=0	24OT.EST.Z=0.15	24OT.EST.Z=0.3	24OT.EST.Z=0.45	SAL.EST.Z=0.prop.bias	12OT.EST.Z=0.prop.bias	24OT.EST.Z=0.prop.bias	SAL.CON.PSE
1	24	31	0	0.0394	0	0.06607	0.35321	0.61917	0.87095	0.95381	0	0.01333	0.0225	0.09917	0.5975	0.87	0.93	0.01083	0.01333	0.15179	0.33036	0.7106	0.89381	0.99667	0	0.01333	0.10321	0.35893	0.74202	0.88524	0.97381	0.01083	0	0.0975	0.23607	0.55631	0.8481	0.9681	0	0.01	0	0.1175	0.5125	0.77	0.96333	-0.25404	0.02857	-0.11857	0.087636
2	24	27	0	0	0	0.04286	0.17202	0.89179	0.99667	1	0	0.0075	0.02857	0.23417	0.93536	0.98238	0.98571	0	0.0075	0	0.1456	0.86393	0.99667	1	0	0.0075	0.01429	0.16274	0.84679	0.99667	1	0	0	0	0.4056	0.92679	1	1	0	0.0075	0	0.17988	0.84964	0.98238	1	0.06215	0.01714	-0.22572	0.063951
3	26	28	0	0.00929	0	0.305	0.58893	0.99595	0.97976	1	0.09357	0.06667	0.23214	0.62107	0.85167	0.94119	0.9581	0.015	0.11524	0.43357	0.78321	0.89881	0.93405	0.9781	0.05786	0.11238	0.33929	0.80607	0.8531	0.99405	0.98667	0.02357	0.13238	0.41357	0.75179	0.91024	1	0.9581	0.02929	0.03524	0.305	0.59179	0.9331	0.9569	0.99238	0.03214	0.02286	-0.16	-0.0539265
4	21	31	0	0.00333	0.01	0.05952	0.30095	0.75667	0.96857	0.9781	0.01762	0.00429	0.0481	0.2981	0.8681	0.92	0.97238	0.00333	0.01857	0.0081	0.38952	0.76238	0.99714	1	0	0.02429	0.07952	0.21238	0.58524	0.93714	0.97238	0.01762	0.01	0.01667	0.2381	0.43952	0.86286	0.98667	0.00333	0	0.01667	0.14667	0.61667	0.94286	0.9781	-0.00285	-0.17714	-0.09143	0.063426
5	23	28	0	0	0.00333	0.06143	0.27381	0.66905	0.90429	0.96048	0.01	0.01583	0.08	0.30167	0.78583	0.8925	1	0	0.00333	0.03	0.27095	0.7519	0.88143	0.97476	0.0025	0.01583	0	0.09167	0.40333	1	0.97083	0.01	0.0319	0.04143	0.11952	0.64333	0.81286	0.95476	0.02429	0	0.01857	0.07095	0.53762	0.87857	0.92619	0.02786	-0.17928	-0.04857	0.0886695
6	22	27	0	0.00333	0.02952	0.10286	0.30667	0.85714	0.97905	0.98667	0	0.02095	0.01714	0.34952	1	0.97905	0.96381	0.00333	0.00095	0	0.26667	0.85429	1	0.98667	0.00333	0.02095	0.03429	0.27238	0.74857	0.97905	1	0.00333	0.02095	0.01429	0.41238	0.91714	0.99333	0.98667	0.0319	0.00667	0.08286	0.40667	0.86	0.98476	0.97238	0.04285	0.00571	-0.00571	0.0451935
7	21	27	0	0.1275	0.28333	0.40667	0.845	0.995	0.98083	1	0.02714	0.21333	0.49667	0.73	0.95429	1	0.99667	0.05286	0.11619	0.51667	0.79286	0.93143	0.99333	0.99667	0.08	0.22333	0.45	0.89	0.91333	0.99333	0.99667	0.02714	0.2419	0.50238	0.84429	1	0.99905	0.99667	0.07286	0.09333	0.42524	0.61571	0.90857	0.99333	0.99667	-0.115	0.09714	-0.22858	-0.156135
8	24	26	0	0	0.00357	0.28476	0.76024	0.95583	0.99667	0.98571	0	0	0.35333	0.59738	0.97298	0.99667	1	0.01429	0.04214	0.37619	0.79881	0.94655	0.99667	1	0.02857	0.095	0.25619	0.75452	0.93583	0.99667	1	0.01429	0.04929	0.29048	1	1	1	1	0	0.07786	0.33905	0.78881	1	0.99667	1	-0.16286	-0.04429	-0.21119	-0.081627
9	28	27	0	0	0.00762	0.2181	0.57048	0.92381	0.99333	0.98238	0.02857	0.04762	0.07238	0.57048	0.90952	0.97905	0.99667	0.02857	0.03619	0.30667	0.77333	0.99524	0.97905	0.99667	0.01429	0.00762	0	0.45619	0.82381	1	0.99667	0	0	0.17238	0.3619	0.88095	0.97905	1	0	0.00762	0.20667	0.56762	0.95238	0.99905	0.98238	0	-0.31714	0.20572	-0.0309705
10	25	27	0	0.02857	0.02857	0.01762	0.19714	0.64143	0.93524	1	0	0.01429	0.0119	0.10857	0.37286	0.7381	0.94952	0	0.01429	0.0319	0.16	0.47571	0.90095	0.98667	0	0	0.00333	0.12286	0.49571	0.85238	0.92952	0	0	0.00333	0.04571	0.39286	0.99524	0.96381	0	0	0.01762	0.09429	0.46429	0.82095	0.89524	-0.08857	-0.03714	0.04858	0.10599
11	24	39	0	0	0.0419	0.14857	0.39286	0.87238	0.9881	0.99905	0	0	0.08286	0.69286	0.83524	0.96238	0.99333	0.01429	0.02762	0.00857	0.43571	0.82952	0.98238	0.99333	0	0.01333	0.1875	0.4725	0.82667	0.99417	0.98083	0	0.03619	0.18	0.55571	0.92095	0.9481	0.99333	0	0.00762	0.19429	0.47	0.8581	0.96238	0.99905	0.3	0.03679	-0.08571	0.021258
12	20	25	0	0.0181	0.19381	0.60524	0.86905	0.98667	0.99333	1	0.20667	0.33667	0.43667	0.88333	0.96667	0.99333	0.99333	0.08381	0.29381	0.51952	0.98905	1	0.99333	1	0.03238	0.22524	0.64524	0.9319	1	0.99333	0.97905	0.07667	0.19	0.49	0.8	0.95333	1	0.99333	0.0581	0.21095	0.63952	0.92619	0.9581	1	0.96476	0.01428	-0.05715	0.12619	-0.180919
13	20	25	0	0.03619	0.13429	0.37333	0.79286	0.98571	0.99333	0.99667	0.0019	0.11429	0.37048	0.83286	0.94571	0.99333	0.95381	0.01333	0.12286	0.39905	0.89571	0.99143	0.97905	0.99667	0.05619	0.06571	0.43048	0.57	0.96	0.99905	1	0.05619	0.08571	0.45905	0.98714	0.93714	1	0.98238	0.05048	0.13429	0.45333	0.80714	0.95143	0.99333	0.99667	0.04	-0.32571	-0.18	-0.113417
14	21	25	1	0.04524	0.01179	0.06202	0.3825	0.80012	0.89917	0.95881	0.03095	0.0375	0.14774	0.49107	0.73155	0.94202	0.96738	0.01667	0.02679	0.12702	0.56179	0.80226	0.94988	1	0.01667	0.08036	0.21917	0.51679	0.90869	0.88774	0.98167	0.04524	0.00607	0.30488	0.60821	0.95726	1	0.93881	0	0.00893	0.23917	0.51107	0.85726	0.98774	0.97881	0.10857	-0.045	-0.09714	0.043074
15	26	26	0	0.04286	0.04095	0.17333	0.69952	0.93905	0.95905	0.97571	0.04286	0	0.1019	0.39381	0.8819	1	0.94714	0.03333	0.02	0.17333	0.47333	0.88333	0.96667	1	0.02857	0.04952	0.07905	0.3481	0.98762	0.94476	0.94143	0.01429	0.02095	0.11333	0.55381	0.9419	0.9019	0.96143	0.07143	0.08381	0.17333	0.46238	0.81619	0.95048	0.96143	-0.30571	-0.12523	-0.09143	-0.052509
16	27	29	0	0	0.04143	0.12619	0.51143	0.78143	0.98	0.99905	0	0	0.20333	0.75143	0.91	1	0.99333	0.02762	0.08714	0.24048	0.52	1	0.97143	0.97905	0	0.03	0.2319	0.56857	0.99	0.96286	1	0.01333	0.02429	0.09762	0.42286	0.87286	1	0.97905	0.01333	0.05286	0.25762	0.56857	0.87286	0.98	0.97905	0.24	0.04857	0.14571	0.00831
17	21	26	0	0	0.00333	0.16714	0.73476	0.90905	0.99333	1	0	0.01762	0.11	0.79762	0.99476	0.99905	1	0.01429	0.00333	0.21857	0.74619	0.96048	0.99333	1	0	0	0.22714	0.8919	1	1	1	0	0.01762	0.22714	0.68619	0.94905	0.97905	1	0	0.00333	0.25	0.62905	0.95476	0.99333	1	0.06286	0.14571	-0.05714	-0.0565875
18	27	25	0	0.00079	0.05714	0.06397	0.41603	0.98667	0.99476	0.99143	0.00651	0	0	0.3246	0.85238	0.96333	0.96	0	0.02	0.09825	0.37317	0.94667	1	1	0.03222	0.03429	0.10397	0.49317	0.75238	0.95476	1	0.03222	0.08667	0.06444	0.39556	0.81667	0.94333	0.96	0.04651	0.00857	0	0.13317	0.70952	0.92905	0.98	-0.09143	0.12	-0.26239	0.0131415
19	23	28	0	0.01429	0.00667	0.02952	0.26857	0.69286	1	1	0	0	0.07238	0.13143	0.50429	0.98905	0.9681	0.01429	0.02095	0.00667	0.25429	0.75571	0.94619	0.99667	0	0.00667	0.06	0.20667	0.60667	0.93	0.99667	0.01429	0.02095	0.08381	0.12571	0.49857	0.9119	0.99667	0	0.00667	0.02381	0.35143	0.71571	0.97476	0.99667	-0.13714	-0.04762	0.22572	0.080829
20	24	28	0	0.01762	0.00345	0.00024	0.12726	0.66905	0.85048	1	0	0.02845	0.00167	0.06655	0.39762	0.85048	1	0.00333	0.01417	0.0931	0.14655	0.64048	0.98476	0.95298	0.00333	0	0.05024	0.15798	0.6119	0.99048	0.97583	0.00333	0.01417	0.01024	0.09798	0.63476	0.90476	0.96726	0.01762	0.05702	0.03024	0.10369	0.5319	0.8619	1	-0.06071	0.01143	0.00571	0.114224
21	26	25	0	0	0.07333	0.25917	0.51607	0.81179	0.90524	0.97393	0.04357	0.02762	0.20488	0.69893	0.94607	1	0.9825	0.015	0.0419	0.03345	0.47036	0.81464	0.9481	1	0	0.01333	0	0.23393	0.68393	0.91952	1	0.02929	0.0219	0.16202	0.34464	0.84607	0.98238	0.96821	0.015	0	0.1106	0.63607	0.85464	0.93095	0.97393	0.18286	-0.23643	0.29143	-0.012837
22	24	34	0	0	0.01	0.03762	0.31286	0.62571	0.98905	1	0	0.01	0.00333	0.18143	0.64571	1	1	0	0	0.01762	0.09857	0.74857	0.98905	1	0	0	0	0.10429	0.69143	0.96905	1	0	0.01	0.00333	0.17	0.51714	0.92619	0.98571	0	0.01	0.00333	0.14714	0.58571	0.97476	1	-0.13143	0.00572	-0.02286	0.0852225
23	20	34	0	0.00333	0	0.02714	0.26476	0.64238	0.89952	0.9581	0	0.00095	0.01857	0.31333	0.4881	0.91095	0.99238	0.00333	0.00667	0.04429	0.23905	0.73381	0.93952	0.99238	0.00333	0.00667	0.02429	0.12762	0.53381	0.85381	0.98667	0.00333	0.00667	0.08714	0.33619	0.72238	0.97381	1	0.00333	0.00667	0.05571	0.30476	0.72238	0.9081	1	0.04857	-0.11143	-0.03143	0.0979275
24	20	33	0	0.08024	0.04937	0.3446	0.67841	0.89056	0.98476	1	0.00024	0.15222	0.43889	0.77841	0.88198	0.98476	0.99667	0.00595	0.19794	0.53889	0.70413	0.96198	0.96476	0.99667	0.03452	0.00079	0.11603	0.63841	0.87627	0.99333	0.98238	0.01595	0.13889	0.24556	0.52508	0.81008	0.97905	0.99667	0.07738	0.11794	0.45889	0.71841	0.9077	0.99333	0.99667	0.1	-0.06572	0.19333	-0.0761595
	AQ	score on the Autism Spectrum Quotient
	SAL	saline
	12OT	12 IU oxytocin
	24OT	24 IU oxytocin
	CON	carrier control
	EST	estratetraenol
	Z	Z score that quantifies the gender of point-light walkers (PLWs)
	Z=0.prop.bias	proportional ‘male’ biases at the gender-neutral point of the PLWs (Z = 0)
	PSE	point of subjective equality
	DL	difference limen
[truncated: 14 more columns]
